# Supplementary material
Source: ML conference proceedings conference paper supplement (https://openreview.net/forum?id=RF3miSqdXa)

Validation Loss

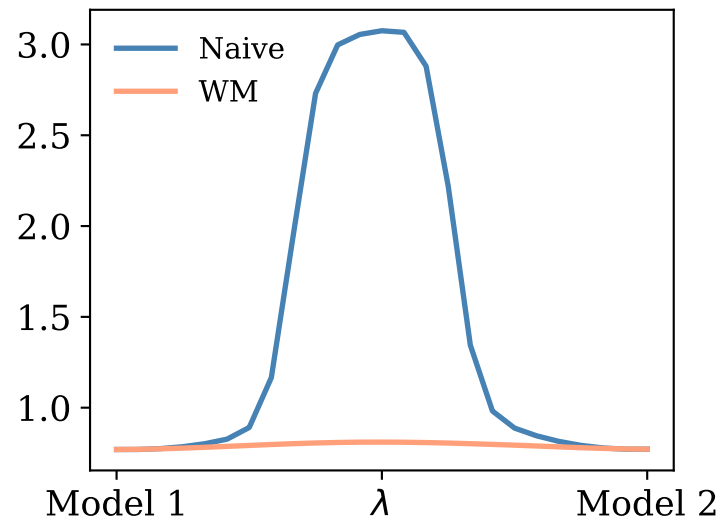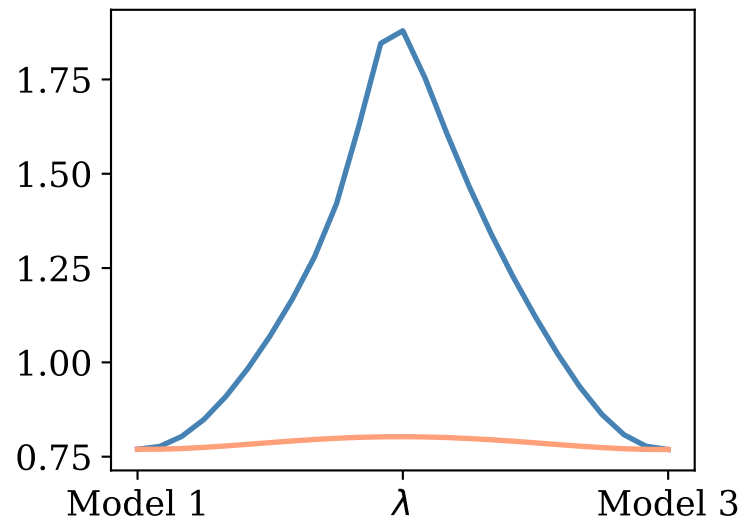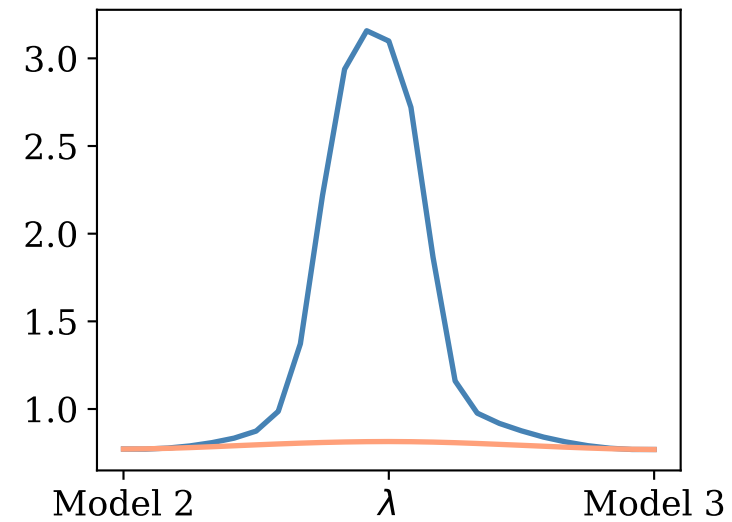

Validation Accuracy (%)

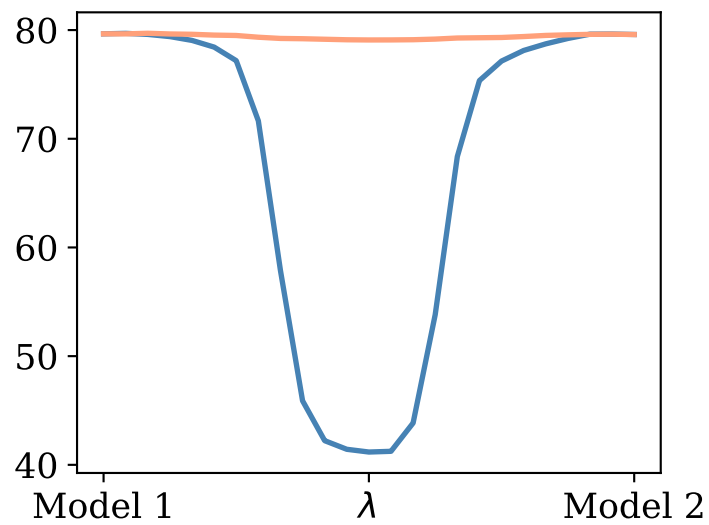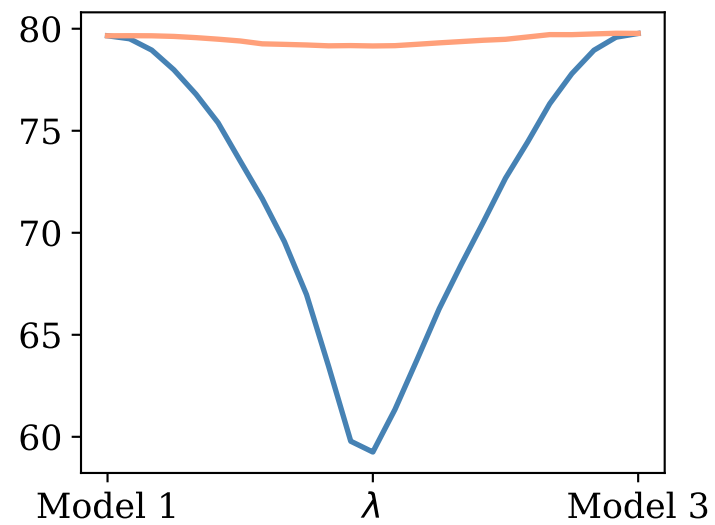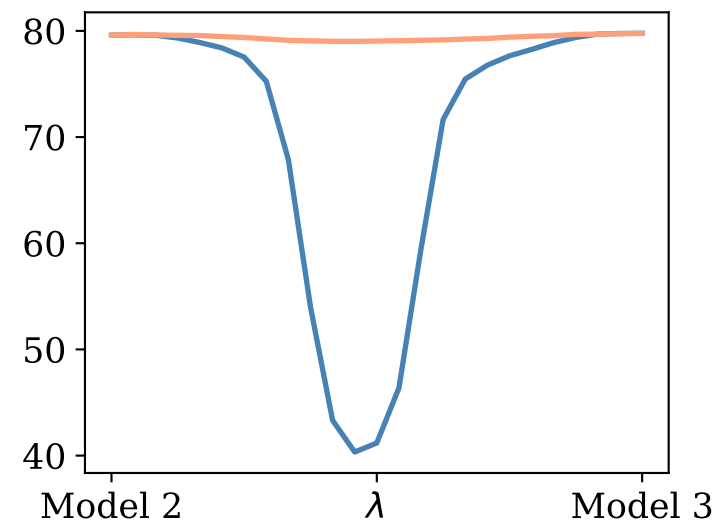

Supplement: supplementary_material [file imagenet_lmc.pdf › lmc-moe-main/plots/imagenet/imagenet_lmc.pdf]

Test Loss

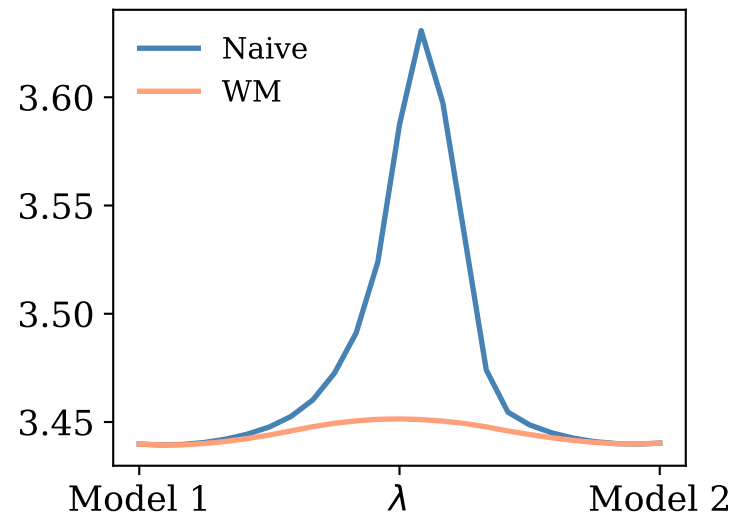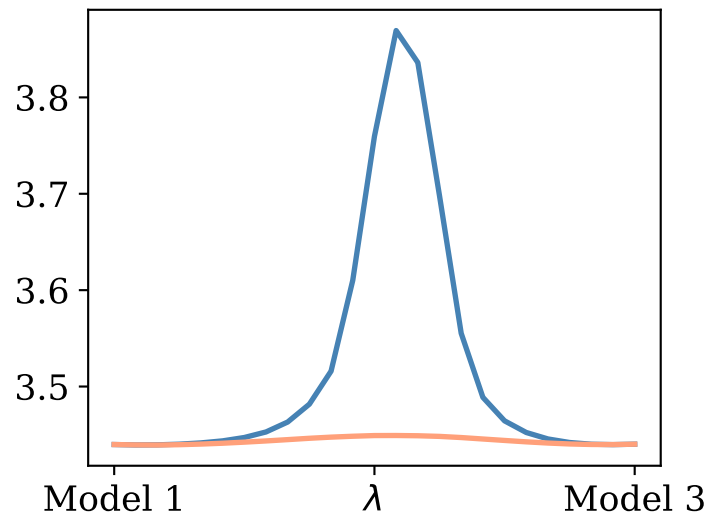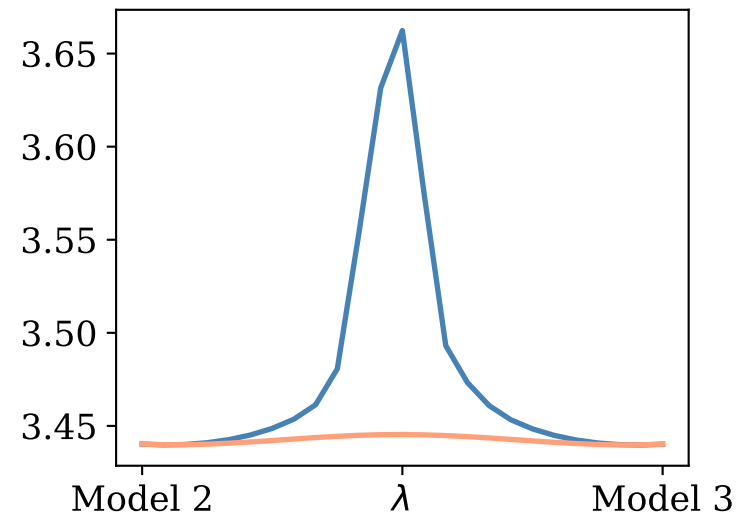

Test Perplexity

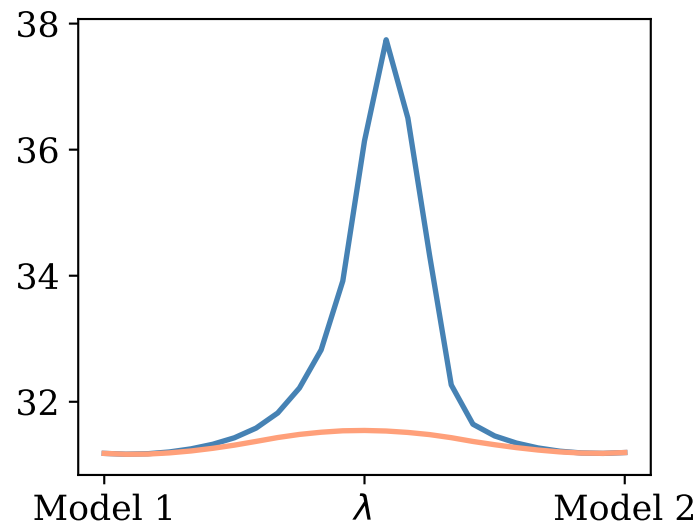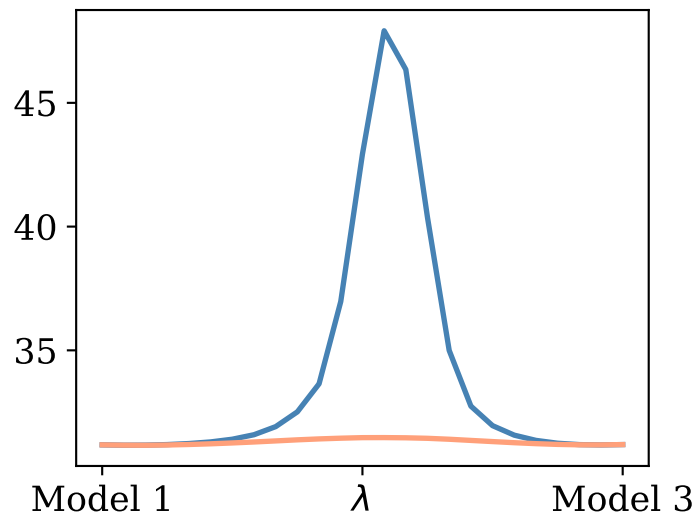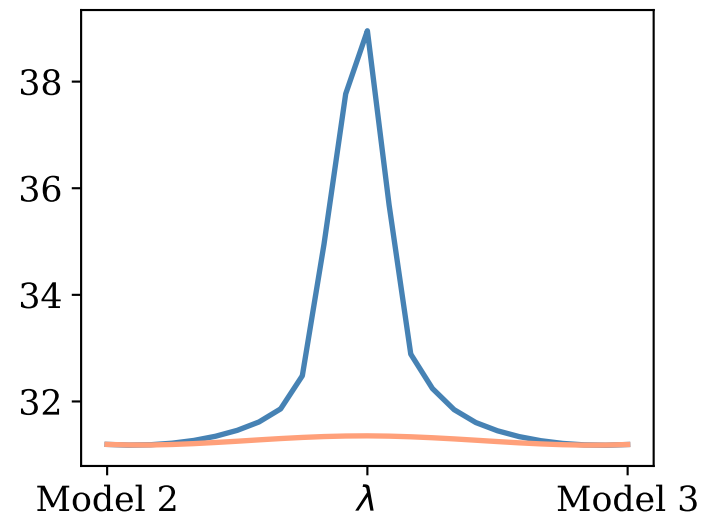

Supplement: supplementary_material [file lm1b_lmc.pdf › lmc-moe-main/plots/lm1b/lm1b_lmc.pdf]

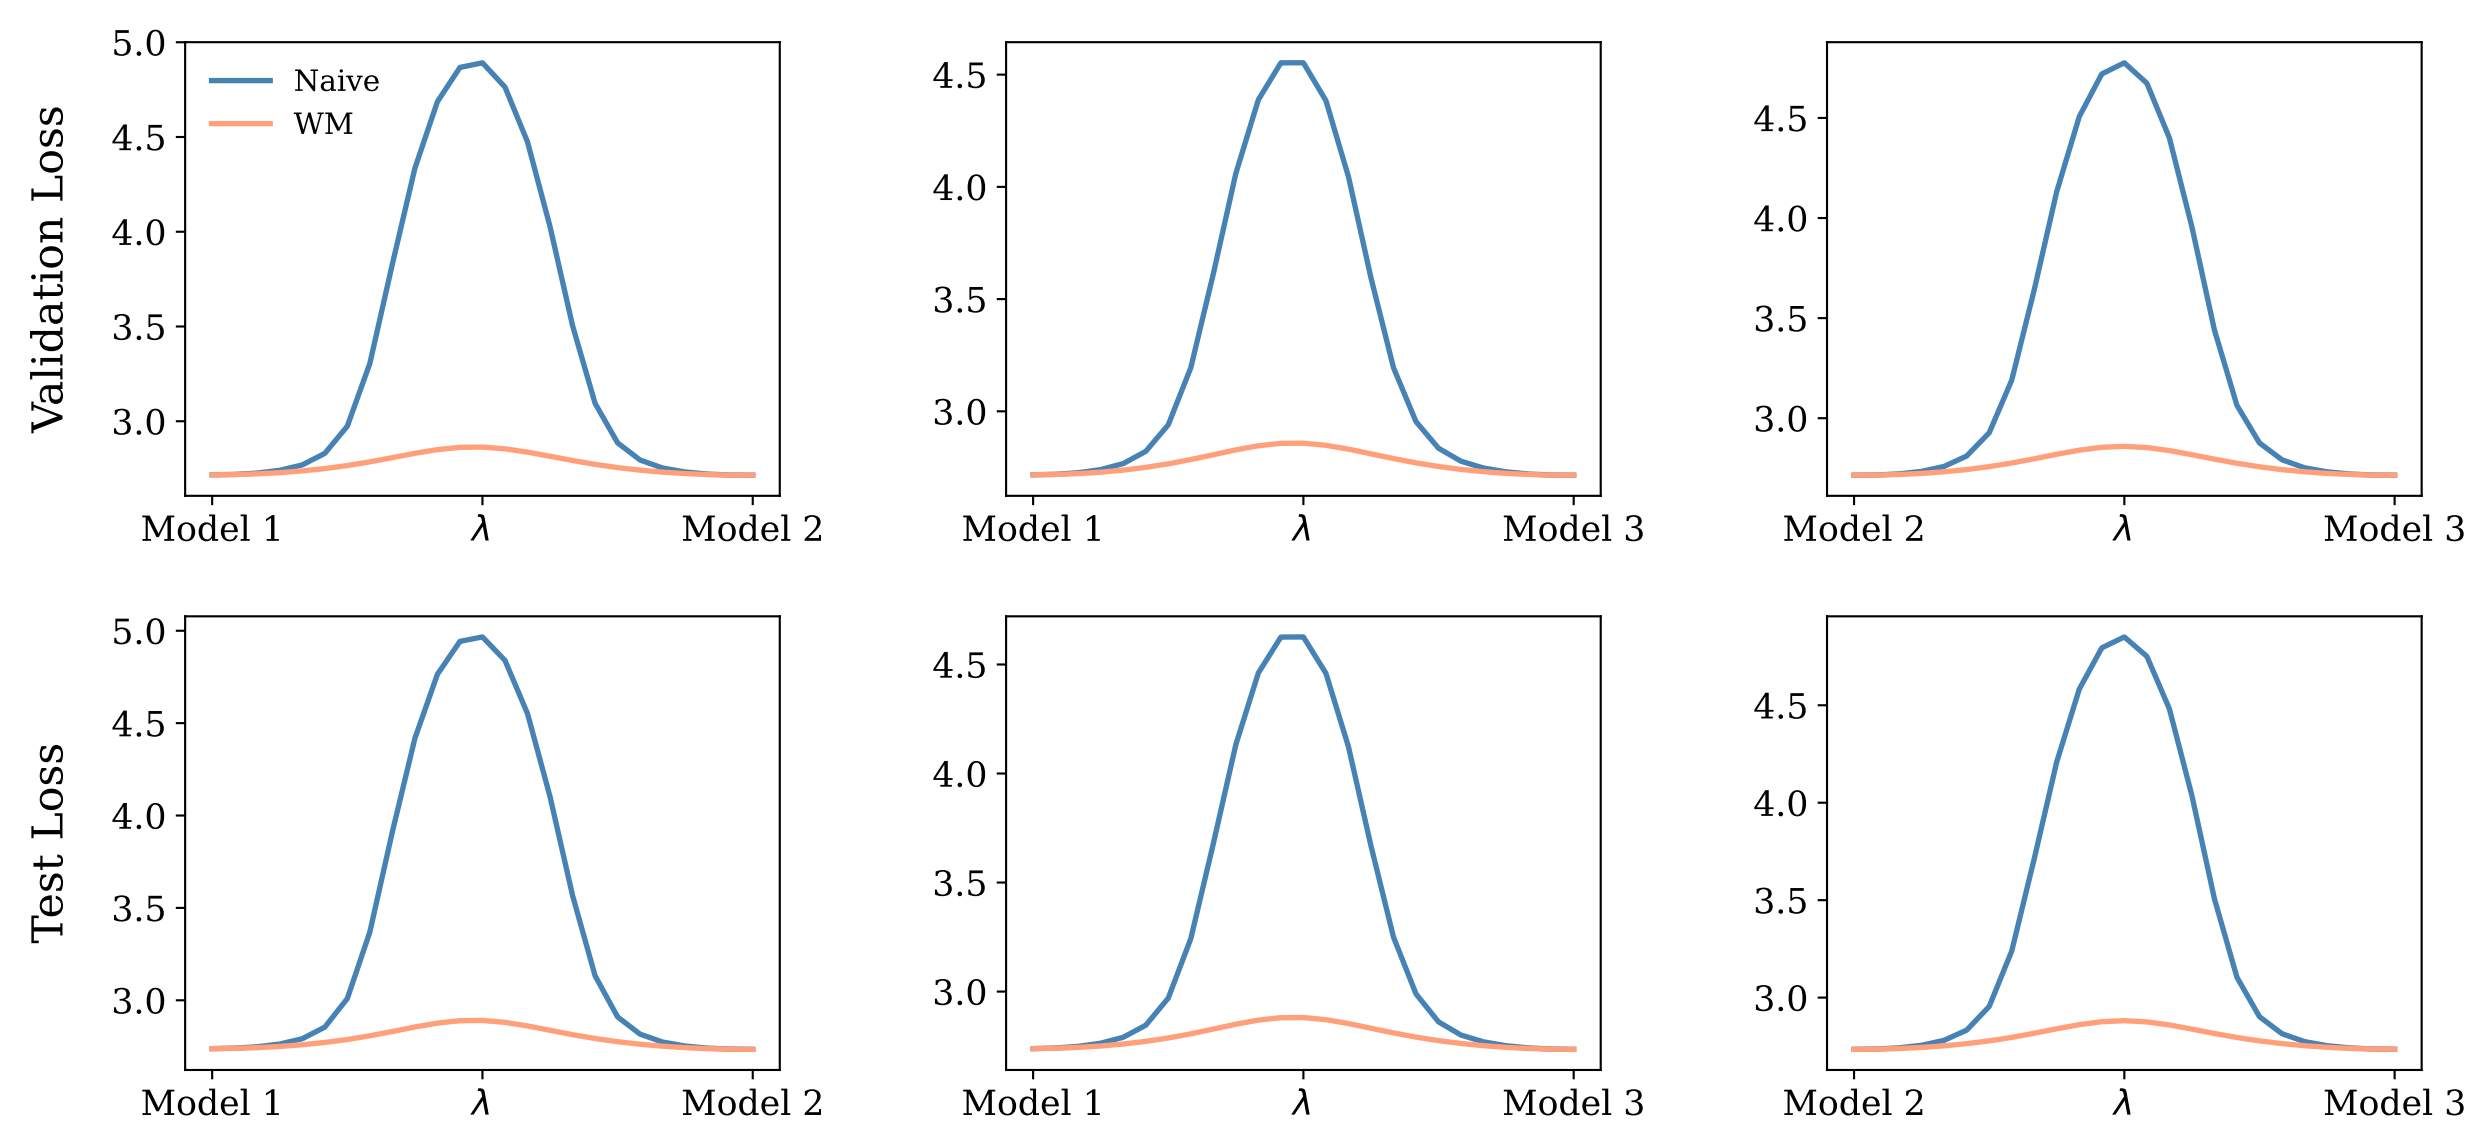

Supplement: supplementary_material [file wikitext_lmc.pdf › lmc-moe-main/plots/wikitext103/wikitext_lmc.pdf]
